# Supplementary material for: Exposure‐response relationships of etrolizumab in patients with moderately‐to‐severely active ulcerative colitis
Source: PubMed Central journal article supplement — CPT Pharmacometrics Syst Pharmacol. 2022 Jul 18;11(9):1234–43. doi: 10.1002/psp4.12840 (PMC9469693; doi:10.1002/psp4.12840), 2022-07-18
Supplement: PSP4-11-1234-s005.pdf [file PSP4-11-1234-s005.pdf]

◆ HIBISCUS I/II ◆ HICKORY

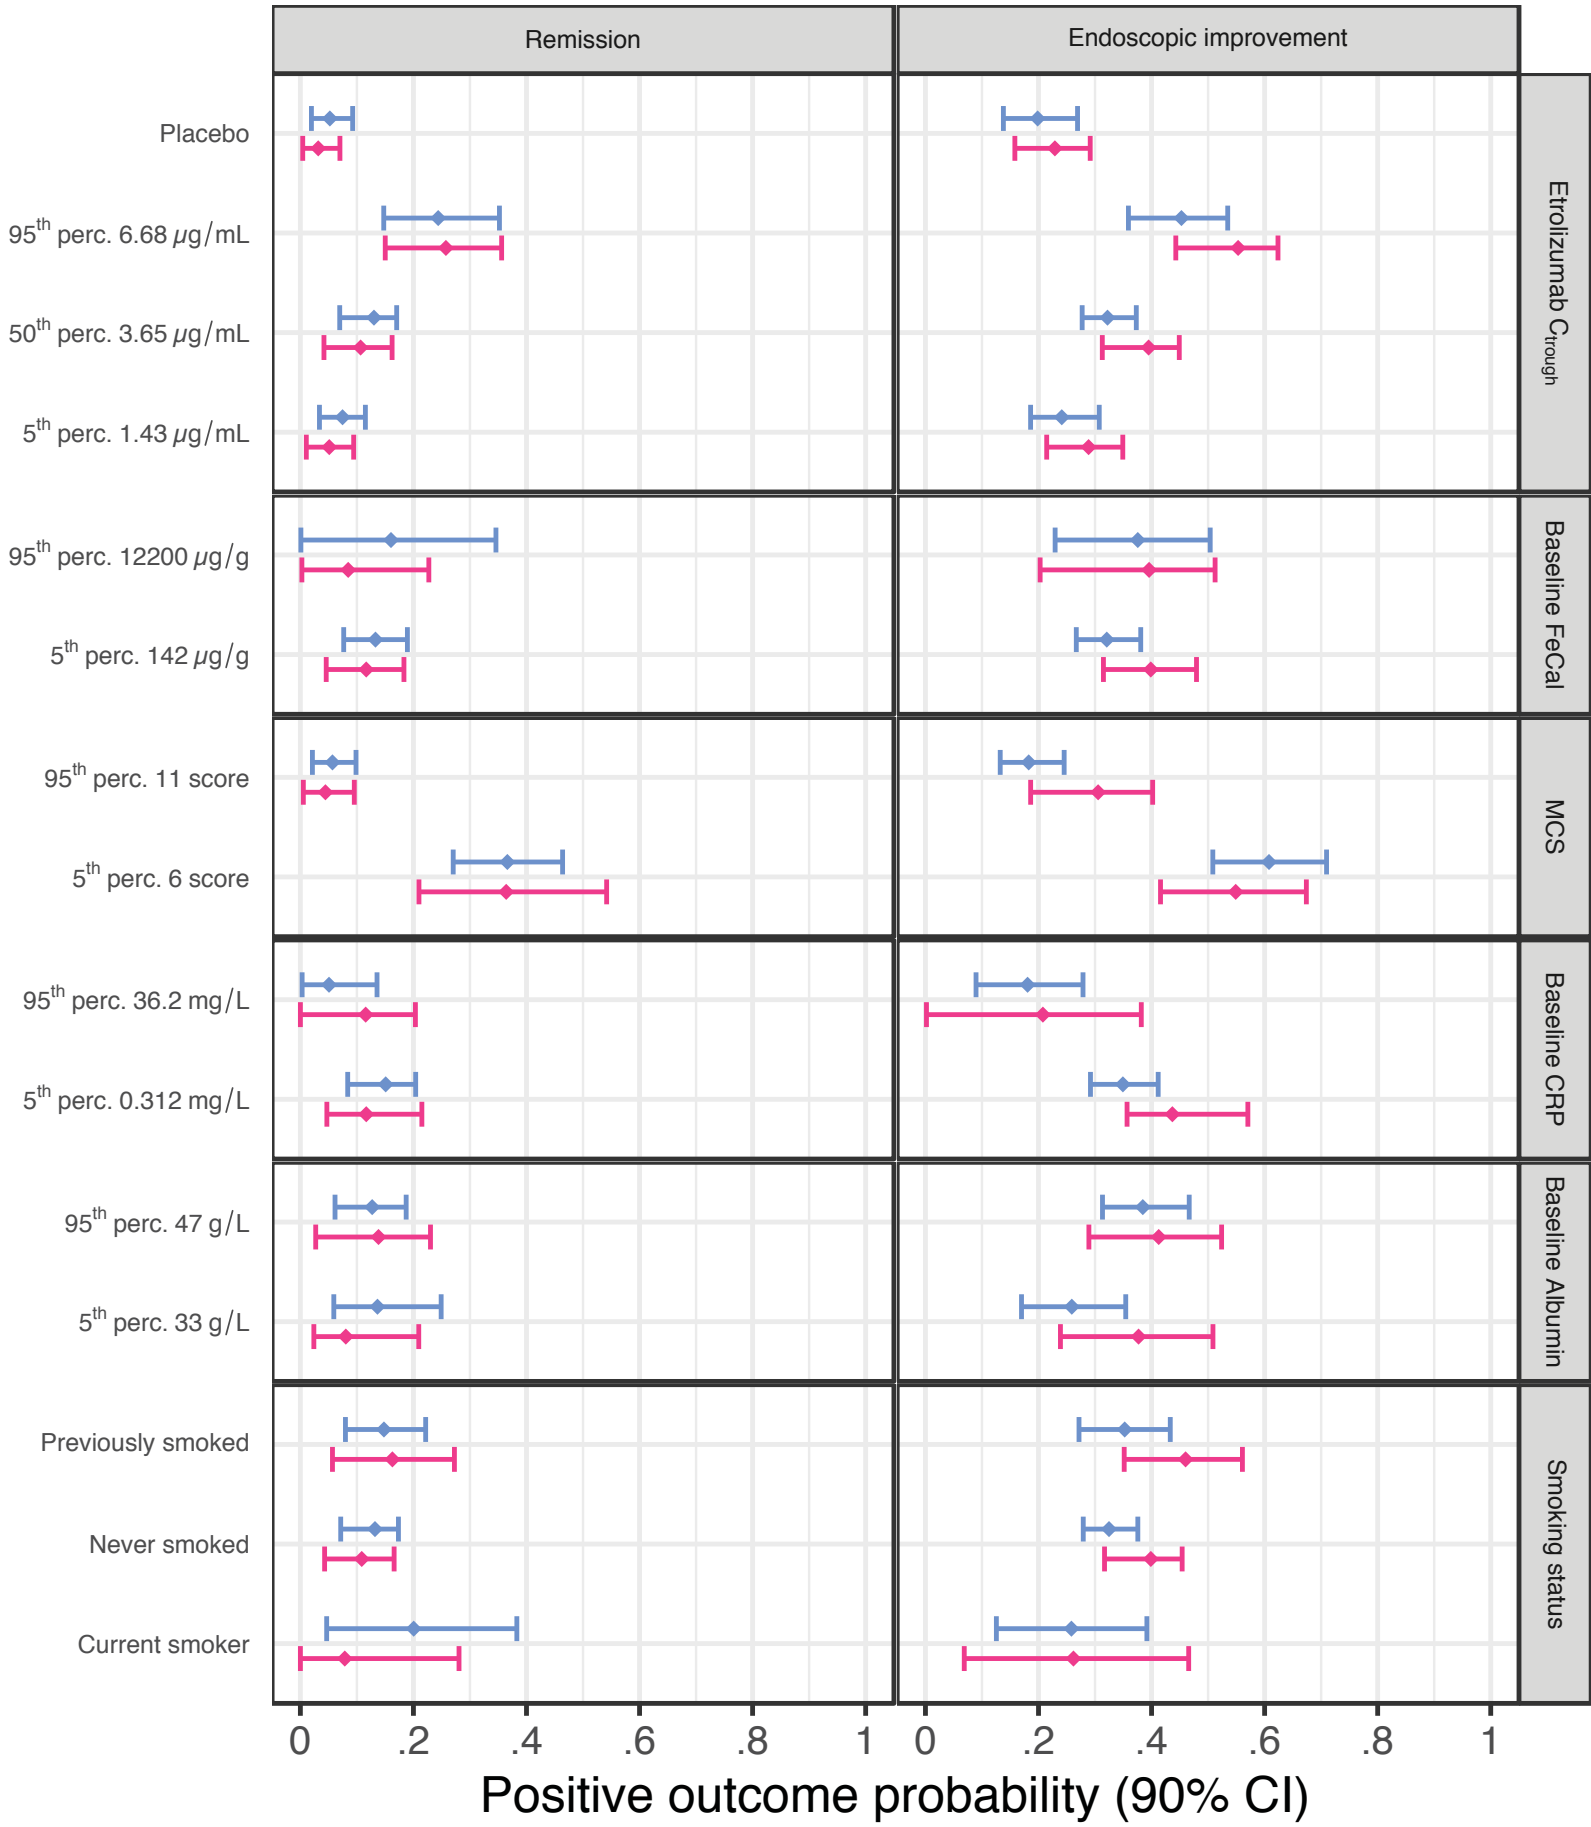

Positive outcome probability (90% CI)

**Figure S2.** Forest plots for all final models based on data from the induction phases of HIBISCUS I/HIBISCUS II and HICKORY. Diamonds and error bars depict the median and 90% confidence interval, respectively, for the outcome proportion derived from a 200-sample bootstrap per model. For each covariate/endpoint, the proportion is presented assuming typical values for all other covariates. A typical subject was treated with etrolizumab with a median exposure of 3.65  $\mu\text{g/mL}$  at week 4 of induction, never smoked and had baseline levels for albumin, CRP, FeCal, and MCS score of 41 g/L, 4.2 mg/L, 1623  $\mu\text{g/g}$ , and 9, respectively. perc: percentile; CRP: C-reactive protein;  $C_{\text{trough}}$ : trough concentration; FeCal: fecal calprotectin; MCS: Mayo Clinic Score.
