# Supplementary material for: Exposure‐response relationships of etrolizumab in patients with moderately‐to‐severely active ulcerative colitis
Source: PubMed Central journal article supplement — CPT Pharmacometrics Syst Pharmacol. 2022 Jul 18;11(9):1234–43. doi: 10.1002/psp4.12840 (PMC9469693; doi:10.1002/psp4.12840), 2022-07-18
Supplement: PSP4-11-1234-s006.pdf [file PSP4-11-1234-s006.pdf]

Etrolizumab C<sub>trough</sub> at week 4 of induction  $\mu\text{g/mL}$

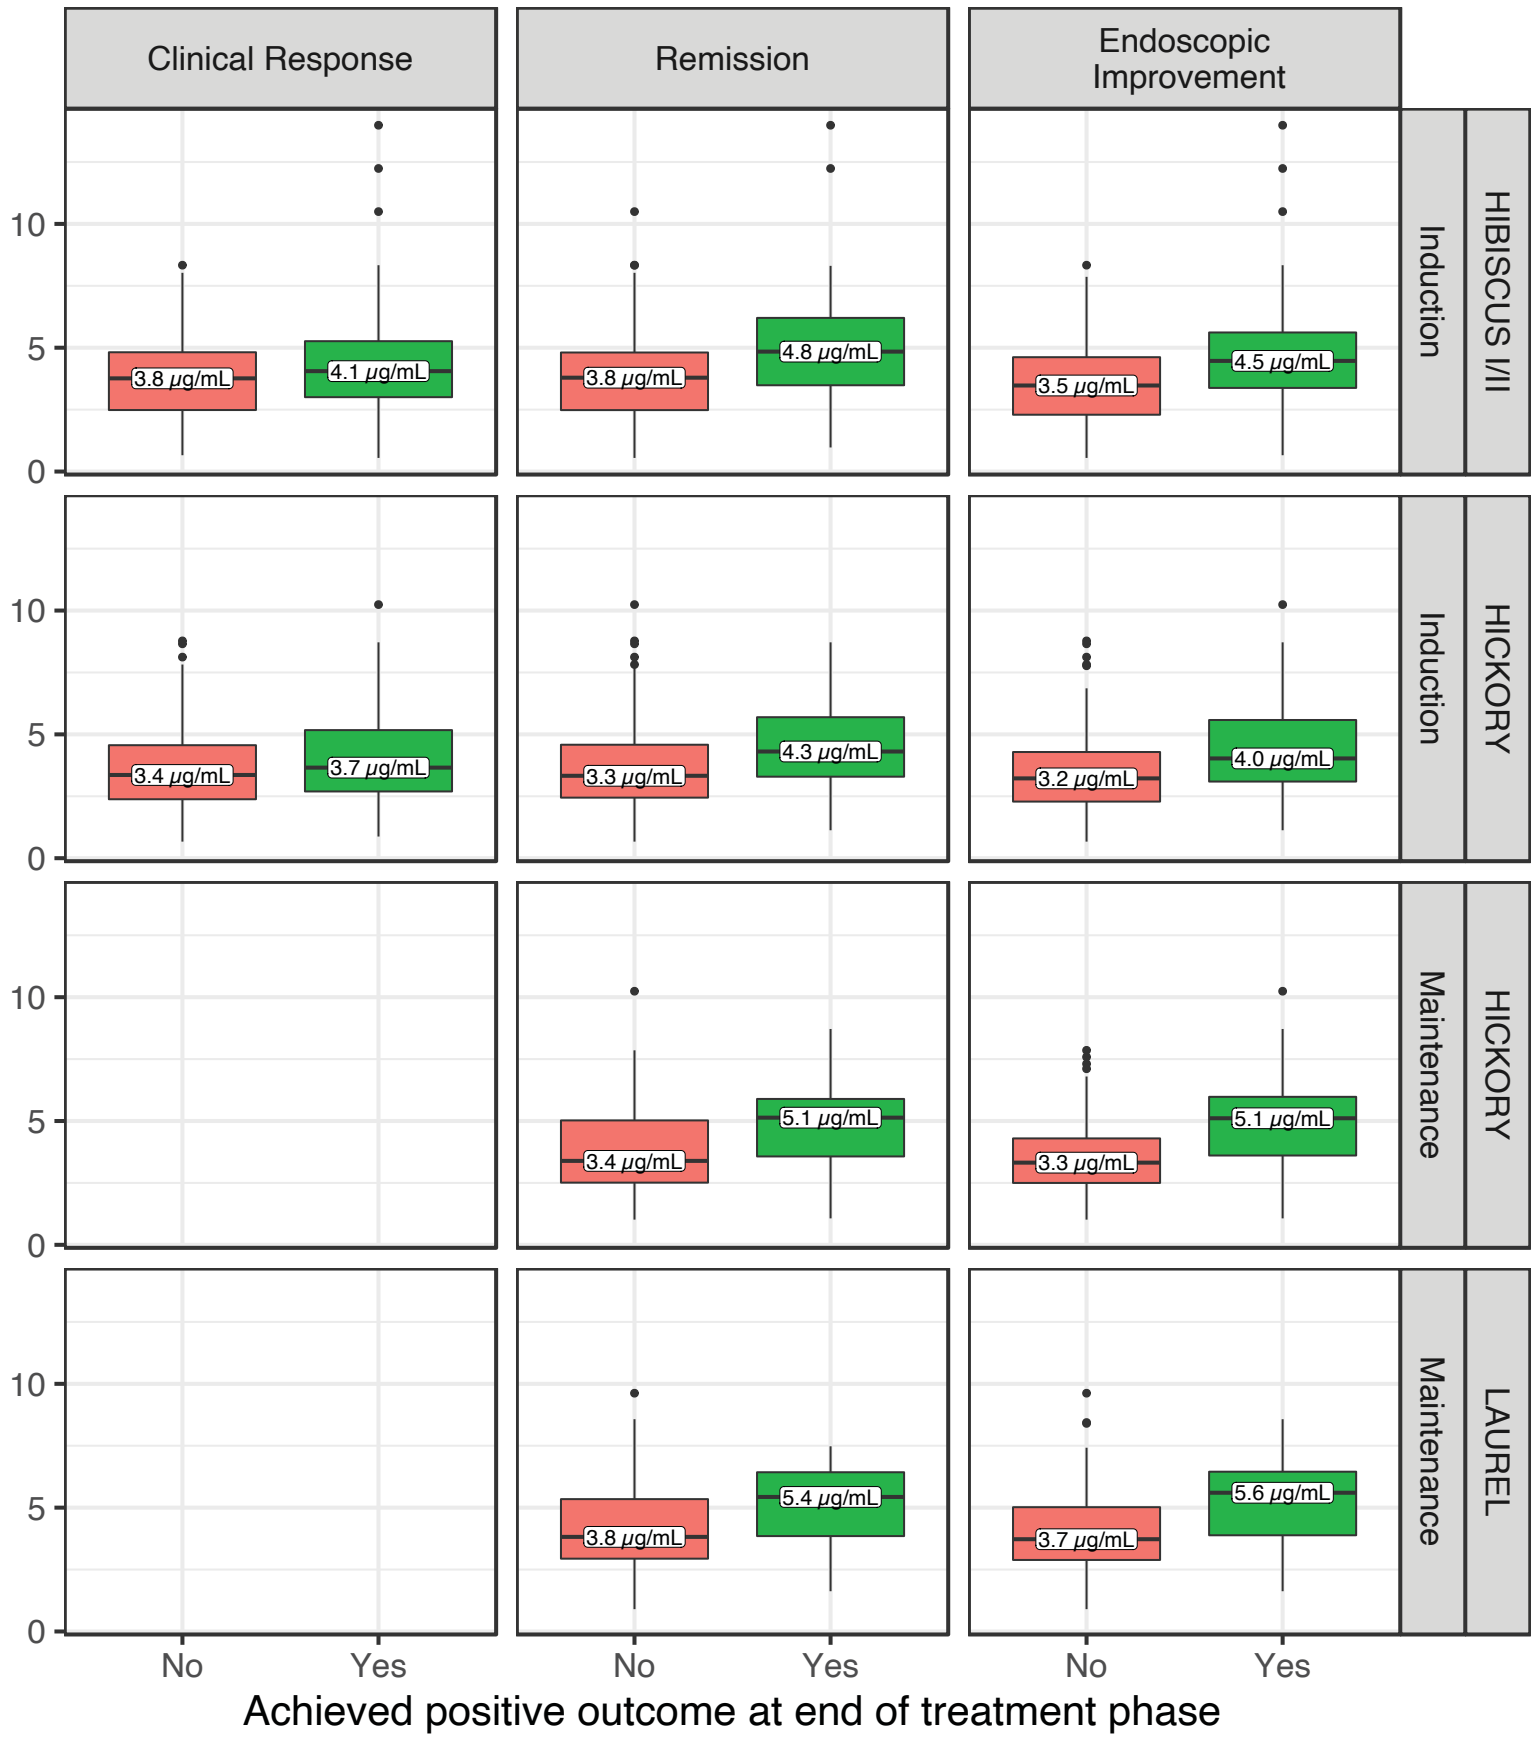

**Figure S1.** Etrolizumab exposure versus outcome status for clinical response, remission, and endoscopic improvement, stratified by study and phase.  $C_{\text{trough}}$ : trough concentration.
